# Supplementary material for: Hybrid Assembly Provides Improved Resolution of Plasmids, Antimicrobial Resistance Genes, and Virulence Factors in Escherichia coli and Klebsiella pneumoniae Clinical Isolates
Source: MDPI journal article supplement (doi:10.3390/microorganisms9122560), 2021-12-10
Supplement: s1 [file s1]

**Supplementary Table S5.** An overview of values for annotation of genomic features of different assemblies from monocultures and mixed culture of *E. coli* and *K. pneumoniae* isolates. Average (SD)\* were calculated after regarding the *E. coli* 3 and *K. pneumoniae* 1 isolate statistics as an outlier and discarding the corresponding data.

|                                | Isolates ID                                    | CDS                                      | rRNA                            | tRNA                             | tmRNA                        | Putative proteins              | Hypothetical proteins                    | Repeat regions               |
|--------------------------------|------------------------------------------------|------------------------------------------|---------------------------------|----------------------------------|------------------------------|--------------------------------|------------------------------------------|------------------------------|
| <i>Illumina</i><br>(Unicycler) | <i>E. coli</i> 1                               | 4739                                     | 4                               | 83                               | 1                            | 13                             | 1149                                     | 0                            |
|                                | <i>E. coli</i> 2                               | 4751                                     | 6                               | 79                               | 1                            | 12                             | 1149                                     | 2                            |
|                                | <i>E. coli</i> 3                               | 4778                                     | 4                               | 78                               | 1                            | 11                             | 1191                                     | 0                            |
|                                | <i>E. coli</i> 4                               | 5538                                     | 5                               | 89                               | 1                            | 10                             | 1789                                     | 2                            |
|                                | <b>Average (SD)</b>                            | <b>4952 (392)</b>                        | <b>5 (1)</b>                    | <b>83 (5)</b>                    | <b>1 (0)</b>                 | <b>12 (2)</b>                  | <b>1320 (314)</b>                        | <b>1 (2)</b>                 |
| <i>MinION</i><br>(Flye)        | <i>E. coli</i> 1                               | 8594                                     | 13                              | 88                               | 1                            | 13                             | 2814                                     | 0                            |
|                                | <i>E. coli</i> 2                               | 7551                                     | 11                              | 67                               | 1                            | 8                              | 2701                                     | 2                            |
|                                | <i>E. coli</i> 3                               | 67                                       | 0                               | 0                                | 0                            | 0                              | 47                                       | 0                            |
|                                | <i>E. coli</i> 4                               | 10648                                    | 22                              | 95                               | 1                            | 15                             | 4451                                     | 2                            |
|                                | <b>Average (SD)</b><br><b>Average * (SD) *</b> | <b>6715 (4615)</b><br><b>8931 (1576)</b> | <b>12 (10)</b><br><b>16 (6)</b> | <b>63 (44)</b><br><b>84 (15)</b> | <b>1 (1)</b><br><b>1 (0)</b> | <b>9 (7)</b><br><b>12 (4)</b>  | <b>2504 (1823)</b><br><b>3322 (980)</b>  | <b>1 (2)</b><br><b>2 (2)</b> |
| <i>Hybrid</i><br>(Unicycler)   | <i>E. coli</i> 1                               | 4794                                     | 22                              | 95                               | 1                            | 13                             | 1177                                     | 0                            |
|                                | <i>E. coli</i> 2                               | 4722                                     | 11                              | 80                               | 1                            | 12                             | 1155                                     | 2                            |
|                                | <i>E. coli</i> 3                               | 4813                                     | 4                               | 78                               | 1                            | 11                             | 1202                                     | 0                            |
|                                | <i>E. coli</i> 4                               | 5837                                     | 22                              | 98                               | 1                            | 11                             | 1948                                     | 2                            |
|                                | <b>Average (SD)</b>                            | <b>5042 (532)</b>                        | <b>15 (9)</b>                   | <b>88 (11)</b>                   | <b>1 (0)</b>                 | <b>12 (1)</b>                  | <b>1371 (386)</b>                        | <b>1 (2)</b>                 |
| <i>Illumina</i><br>(Unicycler) | <i>K. pneumoniae</i> 1                         | 4992                                     | 3                               | 78                               | 1                            | 17                             | 1283                                     | 2                            |
|                                | <i>K. pneumoniae</i> 2                         | 5092                                     | 3                               | 78                               | 1                            | 16                             | 1250                                     | 0                            |
|                                | <i>K. pneumoniae</i> 3                         | 5379                                     | 4                               | 79                               | 1                            | 17                             | 1528                                     | 2                            |
|                                | <i>K. pneumoniae</i> 4                         | 5411                                     | 4                               | 78                               | 1                            | 17                             | 1608                                     | 0                            |
|                                | <i>K. pneumoniae</i> 5                         | 5130                                     | 5                               | 79                               | 1                            | 15                             | 1275                                     | 0                            |
|                                | <b>Average (SD)</b>                            | <b>5201 (185)</b>                        | <b>4 (1)</b>                    | <b>79 (1)</b>                    | <b>1 (0)</b>                 | <b>17 (1)</b>                  | <b>1389 (167)</b>                        | <b>1 (2)</b>                 |
| <i>MinION</i><br>(Flye)        | <i>K. pneumoniae</i> 1                         | 1466                                     | 4                               | 3                                | 0                            | 0                              | 928                                      | 0                            |
|                                | <i>K. pneumoniae</i> 2                         | 7082                                     | 25                              | 86                               | 1                            | 17                             | 2227                                     | 0                            |
|                                | <i>K. pneumoniae</i> 3                         | 8576                                     | 25                              | 88                               | 1                            | 17                             | 3230                                     | 2                            |
|                                | <i>K. pneumoniae</i> 4                         | 11847                                    | 25                              | 82                               | 1                            | 17                             | 5696                                     | 1                            |
|                                | <i>K. pneumoniae</i> 5                         | 11625                                    | 19                              | 73                               | 1                            | 7                              | 6107                                     | 0                            |
|                                | <b>Average (SD)</b><br><b>Average * (SD) *</b> | <b>8120 (3933)</b><br><b>7826 (2339)</b> | <b>20 (10)</b><br><b>19 (3)</b> | <b>67 (36)</b><br><b>66 (7)</b>  | <b>1 (1)</b><br><b>1 (0)</b> | <b>12 (8)</b><br><b>12 (5)</b> | <b>3638 (2227)</b><br><b>3452 (1885)</b> | <b>1 (1)</b><br><b>1 (1)</b> |
| <i>Hybrid</i><br>(Unicycler)   | <i>K. pneumoniae</i> 1                         | 5026                                     | 9                               | 79                               | 1                            | 17                             | 1293                                     | 2                            |
|                                | <i>K. pneumoniae</i> 2                         | 5130                                     | 25                              | 86                               | 1                            | 16                             | 1258                                     | 0                            |
|                                | <i>K. pneumoniae</i> 3                         | 5487                                     | 25                              | 87                               | 1                            | 17                             | 1553                                     | 2                            |
|                                | <i>K. pneumoniae</i> 4                         | 5494                                     | 25                              | 85                               | 1                            | 17                             | 1625                                     | 0                            |
|                                | <i>K. pneumoniae</i> 5                         | 5166                                     | 17                              | 84                               | 1                            | 15                             | 1285                                     | 0                            |
|                                | <b>Average (SD)</b>                            | <b>5261 (217)</b>                        | <b>21 (8)</b>                   | <b>85 (4)</b>                    | <b>1 (0)</b>                 | <b>17 (1)</b>                  | <b>1403 (173)</b>                        | <b>1 (2)</b>                 |
| <i>Illumina</i><br>(Unicycler) | Mixed culture                                  | 10660                                    | 8                               | 164                              | 2                            | 26                             | 3114                                     | 2                            |
| <i>MinION</i><br>(Flye)        | Mixed culture                                  | 20158                                    | 47                              | 181                              | 2                            | 30                             | 8174                                     | 1                            |
| <i>Hybrid</i><br>(Unicycler)   | Mixed culture                                  | 10995                                    | 44                              | 184                              | 2                            | 27                             | 3261                                     | 2                            |
