# Supplementary material for: Hybrid Assembly Provides Improved Resolution of Plasmids, Antimicrobial Resistance Genes, and Virulence Factors in Escherichia coli and Klebsiella pneumoniae Clinical Isolates
Source: MDPI journal article supplement (doi:10.3390/microorganisms9122560), 2021-12-10
Supplement: s1 [file s1]

**Supplementary Table S4.** Basic assembly statistics for different assemblies of monocultures and mixed culture of *E. coli* and *K. pneumoniae* isolates. The mixed culture was obtained from co-culturing of *E. coli* 4 and *K. pneumoniae* 5 isolates. Average (SD)\* values for MinION assembly were calculated after regarding the *E. coli* 3 and *K. pneumoniae* 1 isolate statistics as an outlier and discarding the corresponding data.

|                      |                         | Number of contigs | Largest contig (bp)          | Total length (bp)            | GC (%)        | N50 (bp)                     |
|----------------------|-------------------------|-------------------|------------------------------|------------------------------|---------------|------------------------------|
| Illumina (Unicycler) | <i>E. coli</i> 1        | 100               | 765,416                      | 5,052,925                    | 50.57         | 254,457                      |
|                      | <i>E. coli</i> 2        | 68                | 761,444                      | 5,077,031                    | 50.58         | 281,982                      |
|                      | <i>E. coli</i> 3        | 115               | 620,652                      | 5,066,581                    | 50.79         | 261,702                      |
|                      | <i>E. coli</i> 4        | 269               | 323,518                      | 5,735,389                    | 50.42         | 102,833                      |
|                      | <b>Average (SD)</b>     | <b>138 (90)</b>   | <b>617,758 (207,392)</b>     | <b>5,232,982 (335,084)</b>   | <b>51 (1)</b> | <b>225,244 (82,435)</b>      |
| MinION (Flye)        | <i>E. coli</i> 1        | 50                | 570,493                      | 5,073,148                    | 50.49         | 222,053                      |
|                      | <i>E. coli</i> 2        | 113               | 128,944                      | 4,225,573                    | 50.37         | 47,034                       |
|                      | <i>E. coli</i> 3        | 5                 | 17,872                       | 49,176                       | 39.56         | 16,045                       |
|                      | <i>E. coli</i> 4        | 27                | 2,970,614                    | 6,134,097                    | 50.77         | 1,087,804                    |
|                      | <b>Average (SD)</b>     | <b>49 (47)</b>    | <b>921,981 (1,386,454)</b>   | <b>3,870,499 (2,664,510)</b> | <b>48 (6)</b> | <b>343,234 (504,598)</b>     |
|                      | <b>Average * (SD) *</b> | <b>64 (45)</b>    | <b>1,223,351 (1,529,196)</b> | <b>5,144,273 (956,248)</b>   | <b>51 (1)</b> | <b>452,297 (557,279)</b>     |
| Hybrid (Unicycler)   | <i>E. coli</i> 1        | 30                | 1,929,634                    | 5,121,243                    | 50.61         | 1,392,053                    |
|                      | <i>E. coli</i> 2        | 25                | 1,352,860                    | 5,102,867                    | 50.59         | 1,296,669                    |
|                      | <i>E. coli</i> 3        | 82                | 636,775                      | 5,088,863                    | 50.79         | 336,032                      |
|                      | <i>E. coli</i> 4        | 62                | 275,7897                     | 5,956,168                    | 50.51         | 996,338                      |
|                      | <b>Average (SD)</b>     | <b>50 (28)</b>    | <b>1,669,292 (897,972)</b>   | <b>5,317,286 (426,129)</b>   | <b>51 (1)</b> | <b>1,005,273 (476,961)</b>   |
| Illumina (Unicycler) | <i>K. pneumoniae</i> 1  | 82                | 653,447                      | 5,374,307                    | 57.35         | 251,480                      |
|                      | <i>K. pneumoniae</i> 2  | 57                | 815,437                      | 5,465,685                    | 57.10         | 348,149                      |
|                      | <i>K. pneumoniae</i> 3  | 84                | 479,668                      | 5,797,728                    | 56.67         | 200,979                      |
|                      | <i>K. pneumoniae</i> 4  | 88                | 862,848                      | 5,737,695                    | 56.82         | 350,054                      |
|                      | <i>K. pneumoniae</i> 5  | 77                | 927,949                      | 5,510,849                    | 57.64         | 311,143                      |
|                      | <b>Average (SD)</b>     | <b>78 (13)</b>    | <b>747,870 (181,013)</b>     | <b>5,577,253 (181,931)</b>   | <b>58 (1)</b> | <b>247,095 (138,114)</b>     |
| MinION (Flye)        | <i>K. pneumoniae</i> 1  | 30                | 53,004                       | 715,682                      | 55.53         | 33,058                       |
|                      | <i>K. pneumoniae</i> 2  | 3                 | 5,315,630                    | 5,519,519                    | 57.09         | 5,315,630                    |
|                      | <i>K. pneumoniae</i> 3  | 9                 | 3,308,867                    | 5,906,847                    | 56.61         | 3,308,867                    |
|                      | <i>K. pneumoniae</i> 4  | 54                | 2,675,543                    | 5,907,851                    | 56.73         | 1,219,455                    |
|                      | <i>K. pneumoniae</i> 5  | 78                | 326,735                      | 5,424,990                    | 57.67         | 103,491                      |
|                      | <b>Average (SD)</b>     | <b>35 (32)</b>    | <b>2,335,956 (2,190,273)</b> | <b>4,694,978 (2,235,357)</b> | <b>57 (1)</b> | <b>1,996,101 (2,279,327)</b> |
|                      | <b>Average * (SD) *</b> | <b>36 (37)</b>    | <b>2,906,694 (2,055,427)</b> | <b>5,689,802 (254,150)</b>   | <b>58 (1)</b> | <b>2,486,861 (2,306,831)</b> |
| Hybrid (Unicycler)   | <i>K. pneumoniae</i> 1  | 43                | 866,749                      | 5,411,988                    | 57.33         | 499,601                      |
|                      | <i>K. pneumoniae</i> 2  | 4                 | 5,321,058                    | 5,530,587                    | 57.06         | 5,321,058                    |
|                      | <i>K. pneumoniae</i> 3  | 8                 | 5,319,674                    | 5,907,459                    | 56.60         | 5,319,674                    |
|                      | <i>K. pneumoniae</i> 4  | 14                | 5,308,446                    | 5,832,296                    | 56.75         | 5,308,446                    |
|                      | <i>K. pneumoniae</i> 5  | 28                | 2,952,457                    | 5,558,222                    | 57.59         | 2,952,457                    |
|                      | <b>Average (SD)</b>     | <b>20 (17)</b>    | <b>3,953,677 (2,006,405)</b> | <b>5,648,111 (211,443)</b>   | <b>58 (1)</b> | <b>3,880,248 (2,149,256)</b> |
| Illumina (Unicycler) | Mix culture             | 371               | 927,949                      | 11,193,506                   | 53.97         | 147,235                      |
| MinION (Flye)        | Mix culture             | 120               | 1,141,119                    | 11,827,293                   | 53.99         | 344,695                      |
| Hybrid (Unicycler)   | Mix culture             | 117               | 5,202,502                    | 11,495,693                   | 53.93         | 1,245,846                    |
